# Supplementary material for: Identification of prognostic genes in uveal melanoma microenvironment
Source: PubMed Central journal article supplement (PMC7668584; doi:10.1371/journal.pone.0242263), 2020-11-16
Supplement: pone.0242263.s001.pdf [file pone.0242263.s001.pdf]

**S1 Table. Immune and stromal scores of each sample of TCGA-UVM cohort.**

| ID              | StromalScore | ImmuneScore  | ESTIMATEScore |
|-----------------|--------------|--------------|---------------|
| TCGA-VD-A8KM-01 | -185.4095519 | 1704.279428  | 1518.869876   |
| TCGA-V4-A9F4-01 | -1029.591707 | -1042.336117 | -2071.927823  |
| TCGA-WC-A881-01 | -1283.217101 | -921.5091353 | -2204.726236  |
| TCGA-V4-A9F1-01 | -932.2540914 | -396.3398323 | -1328.593924  |
| TCGA-VD-AA8N-01 | -745.594673  | 116.2847118  | -629.3099612  |
| TCGA-V4-A9EY-01 | -867.4359065 | -525.5062604 | -1392.942167  |
| TCGA-V4-A9EI-01 | -1378.805844 | -793.2370604 | -2172.042904  |
| TCGA-VD-AA8O-01 | -1321.909027 | -8.777790588 | -1330.686817  |
| TCGA-WC-A880-01 | -1390.010288 | -999.585495  | -2389.595783  |
| TCGA-WC-A882-01 | -565.1581264 | -289.3840316 | -854.5421581  |
| TCGA-VD-AA8P-01 | -1089.194136 | -1098.429914 | -2187.62405   |
| TCGA-WC-AA9E-01 | -1438.309537 | -1131.440002 | -2569.749539  |
| TCGA-V4-A9F8-01 | -924.9451692 | -545.2106049 | -1470.155774  |
| TCGA-VD-A8K9-01 | -1678.721217 | -1236.363867 | -2915.085085  |
| TCGA-V4-A9EZ-01 | -1297.485924 | -580.4631479 | -1877.949072  |
| TCGA-VD-AA8Q-01 | -876.253348  | -192.5257646 | -1068.779113  |
| TCGA-V4-A9E9-01 | -1566.266678 | -1123.924451 | -2690.191129  |
| TCGA-VD-A8KL-01 | -1250.547388 | -1296.907568 | -2547.454956  |
| TCGA-WC-A87T-01 | -1730.288441 | -1467.068428 | -3197.35687   |
| TCGA-YZ-A980-01 | -970.7241604 | -1138.558073 | -2109.282233  |
| TCGA-VD-AA8M-01 | -1255.351448 | -884.836451  | -2140.187899  |
| TCGA-VD-AA8T-01 | -1254.979012 | -1043.34181  | -2298.320821  |
| TCGA-VD-A8KI-01 | -1236.225382 | -555.3127179 | -1791.5381    |
| TCGA-V4-A9ED-01 | -516.1946528 | -176.7985886 | -692.9932414  |
| TCGA-V3-A9ZX-01 | -912.9509515 | 215.4125071  | -697.5384444  |
| TCGA-VD-A8KJ-01 | -1387.856382 | -1260.64982  | -2648.506202  |
| TCGA-YZ-A985-01 | -1240.549834 | -935.9068414 | -2176.456675  |
| TCGA-V4-A9EJ-01 | -1456.770539 | -985.9915014 | -2442.76204   |
| TCGA-VD-A8KE-01 | -1172.298107 | -988.026107  | -2160.324214  |
| TCGA-V4-A9ES-01 | -1763.107171 | -1221.944383 | -2985.051554  |
| TCGA-WC-A88A-01 | -1039.640196 | -881.2391226 | -1920.879319  |
| TCGA-V4-A9EH-01 | -1214.093356 | -323.6078516 | -1537.701207  |
| TCGA-WC-A87Y-01 | -1042.052548 | 8.304155502  | -1033.748392  |
| TCGA-V4-A9F0-01 | -696.7340407 | -381.1058187 | -1077.839859  |
| TCGA-V4-A9EM-01 | -1089.331361 | -803.3857222 | -1892.717084  |
| TCGA-V4-A9EO-01 | -1346.060444 | -1355.704478 | -2701.764922  |
| TCGA-WC-A888-01 | -885.6994454 | 1055.129329  | 169.4298838   |
| TCGA-VD-A8KD-01 | -840.0975812 | 893.6357166  | 53.53813538   |
| TCGA-V4-A9ET-01 | -1348.751742 | -1140.868541 | -2489.620283  |
| TCGA-V4-A9EC-01 | -1465.003532 | -1203.847871 | -2668.851403  |
| TCGA-V4-A9EQ-01 | -961.386999  | -461.5677101 | -1422.954709  |
| TCGA-VD-A8KH-01 | -1711.789992 | -1397.028368 | -3108.818359  |
| TCGA-V4-A9F5-01 | -1484.988661 | -1104.115063 | -2589.103725  |
| TCGA-WC-A883-01 | -1062.728823 | -965.9880957 | -2028.716918  |
| TCGA-WC-AA9A-01 | -1851.237963 | -1471.790882 | -3323.028846  |
| TCGA-VD-A8KF-01 | -1163.913414 | -854.8878053 | -2018.801219  |
| TCGA-VD-A8KG-01 | -1113.003497 | -436.0056268 | -1549.009124  |

|                 |              |              |              |
|-----------------|--------------|--------------|--------------|
| TCGA-V4-A9EL-01 | -782.3911633 | 535.101705   | -247.2894584 |
| TCGA-V4-A9E8-01 | -572.8840561 | 441.3230938  | -131.5609623 |
| TCGA-V4-A9F3-01 | -677.5231799 | 514.9835843  | -162.5395956 |
| TCGA-WC-A885-01 | -1777.925574 | -1404.888014 | -3182.813588 |
| TCGA-V4-A9EK-01 | -1060.714818 | -77.61599499 | -1138.330813 |
| TCGA-V4-A9EU-01 | -1149.015525 | -519.2707925 | -1668.286318 |
| TCGA-RZ-AB0B-01 | -1146.971909 | -890.6633148 | -2037.635224 |
| TCGA-V4-A9EX-01 | -1259.915276 | -927.3432104 | -2187.258486 |
| TCGA-WC-A87W-01 | -929.2991372 | -1377.462331 | -2306.761469 |
| TCGA-WC-A87U-01 | -1378.554365 | -1166.132009 | -2544.686374 |
| TCGA-VD-A8KK-01 | -1168.54051  | -659.4917431 | -1828.032253 |
| TCGA-V4-A9EV-01 | -729.6063709 | 1504.811999  | 775.2056278  |
| TCGA-VD-A8KO-01 | -1712.443194 | -1505.595047 | -3218.038241 |
| TCGA-VD-A8KN-01 | -688.5302495 | 276.9553022  | -411.5749474 |
| TCGA-V4-A9EW-01 | -1484.314208 | -1329.392747 | -2813.706955 |
| TCGA-V4-A9E5-01 | -1346.455615 | -926.4395548 | -2272.89517  |
| TCGA-V4-A9F7-01 | -1666.433053 | -1312.792268 | -2979.225321 |
| TCGA-V4-A9EA-01 | -1309.41108  | -912.0443658 | -2221.455446 |
| TCGA-WC-A884-01 | -521.2548401 | -149.964478  | -671.2193181 |
| TCGA-VD-A8KB-01 | -1443.392536 | -1537.493193 | -2980.88573  |
| TCGA-YZ-A982-01 | -1296.743205 | -603.4258051 | -1900.16901  |
| TCGA-YZ-A984-01 | -884.2250894 | -1273.092137 | -2157.317227 |
| TCGA-VD-A8K8-01 | -1251.125105 | 391.0137783  | -860.1113263 |
| TCGA-YZ-A983-01 | -1490.733861 | -925.4379616 | -2416.171823 |
| TCGA-V3-A9ZY-01 | -1280.339045 | -743.8115802 | -2024.150625 |
| TCGA-V4-A9EE-01 | -1111.630217 | -351.1701049 | -1462.800322 |
| TCGA-VD-A8KA-01 | -1557.436164 | -1370.682124 | -2928.118288 |
| TCGA-V4-A9F2-01 | -740.0534428 | -229.2675581 | -969.3210009 |
| TCGA-V4-A9EF-01 | -1169.294263 | -840.0438503 | -2009.338113 |
| TCGA-V4-A9E7-01 | -1717.736288 | -1373.278038 | -3091.014326 |
| TCGA-VD-A8K7-01 | -1634.651593 | -1415.342741 | -3049.994334 |
| TCGA-VD-AA8R-01 | -1501.019626 | -1416.255195 | -2917.27482  |
| TCGA-VD-AA8S-01 | -770.5917738 | -812.8210978 | -1583.412872 |

---
