# Supplementary material for: Identification of prognostic genes in uveal melanoma microenvironment
Source: PubMed Central journal article supplement (PMC7668584; doi:10.1371/journal.pone.0242263), 2020-11-16
Supplement: pone.0242263.s002.pdf [file pone.0242263.s002.pdf]

**S2 Table. 959 intersection differentially expressed genes between high and low scores.**

| Gene      | Regulation |
|-----------|------------|
| ASS1      | up         |
| SPN       | up         |
| LRRTM2    | up         |
| ITGA4     | up         |
| ITGA5     | up         |
| SDK2      | up         |
| CHST1     | up         |
| ITGAX     | up         |
| BCL2A1    | up         |
| ITGAL     | up         |
| NOV       | up         |
| COX4I2    | up         |
| CRTAM     | up         |
| ATP1A3    | up         |
| ATP1A2    | up         |
| IL10RA    | up         |
| CFB       | up         |
| CFP       | up         |
| LOC283070 | up         |
| RUNX2     | up         |
| IGFBP2    | up         |
| IGFBP4    | up         |
| APLNR     | up         |
| CLIC2     | up         |
| CLIC3     | up         |
| FOXL1     | up         |
| HLA-DPA1  | up         |
| ZAP70     | up         |
| LILRB3    | up         |
| NDRG4     | up         |
| HLA-DQB1  | up         |
| MRC2      | up         |
| FOXS1     | up         |
| LPAR5     | up         |
| MYO1G     | up         |
| MYO1F     | up         |
| GALNTL4   | up         |
| LGALS9    | up         |
| LGALS3    | up         |
| LGALS2    | up         |
| ASAP3     | up         |
| ITGAD     | up         |
| LOC96610  | up         |
| ARHGAP25  | up         |
| C1orf38   | up         |
| RSAD2     | up         |
| CAPG      | up         |

|          |    |
|----------|----|
| FCER1G   | up |
| SLA2     | up |
| FAM49A   | up |
| TNFSF10  | up |
| EVI2A    | up |
| EVI2B    | up |
| GNA15    | up |
| GRIN2D   | up |
| BCAT1    | up |
| NOVA1    | up |
| CCL21    | up |
| CCL22    | up |
| CCL26    | up |
| FAM70A   | up |
| FAM70B   | up |
| UBE2L6   | up |
| ZNF831   | up |
| CD200R1  | up |
| RARRES2  | up |
| IL2RA    | up |
| IL2RB    | up |
| IL2RG    | up |
| RARRES3  | up |
| C16orf54 | up |
| PRKCDBP  | up |
| P2RY8    | up |
| MMP25    | up |
| LIF      | up |
| NCF1     | up |
| HLA-DRB1 | up |
| HLA-DRB6 | up |
| XAF1     | up |
| HLA-DRB5 | up |
| FN1      | up |
| SYT5     | up |
| LAG3     | up |
| SASH3    | up |
| GAL3ST4  | up |
| HLA-DMB  | up |
| TBX21    | up |
| PLA2G7   | up |
| FPR1     | up |
| FPR3     | up |
| NT5E     | up |
| LGALS9C  | up |
| MAP1A    | up |
| MAP1B    | up |
| VGFB     | up |
| TMEM200B | up |

|          |    |
|----------|----|
| TMEM156  | up |
| C1S      | up |
| C1R      | up |
| PRF1     | up |
| TMEM178  | up |
| CD300C   | up |
| EOMES    | up |
| KIAA0748 | up |
| ICOS     | up |
| ADAM11   | up |
| ADAM19   | up |
| CPNE5    | up |
| UCP2     | up |
| PCSK2    | up |
| SLC16A6  | up |
| SCRG1    | up |
| OSR2     | up |
| ISM1     | up |
| CDKN1A   | up |
| MFNG     | up |
| GJA1     | up |
| GJA5     | up |
| VCAM1    | up |
| PLEKHO1  | up |
| TIGIT    | up |
| IFITM1   | up |
| POU2AF1  | up |
| TM4SF19  | up |
| LAMB3    | up |
| CYSLTR2  | up |
| GPR162   | up |
| TGFB1    | up |
| COX7A1   | up |
| DLL4     | up |
| IFI6     | up |
| STAB1    | up |
| ABI3     | up |
| RHOH     | up |
| IL12RB1  | up |
| ADCY1    | up |
| ADCY2    | up |
| PDLIM4   | up |
| CLEC7A   | up |
| CTLA4    | up |
| KCNA3    | up |
| IL15     | up |
| PLA2G2D  | up |
| HS3ST2   | up |
| CYFIP2   | up |

|          |    |
|----------|----|
| BCL3     | up |
| OAS2     | up |
| TRIM22   | up |
| OASL     | up |
| ATP8B4   | up |
| DES      | up |
| FBXL7    | up |
| HTR2B    | up |
| TLR8     | up |
| ACE      | up |
| HLA-C    | up |
| SLC7A7   | up |
| GLIPR2   | up |
| GLIPR1   | up |
| GGT1     | up |
| PTPRC    | up |
| PTPRO    | up |
| SIRPG    | up |
| ABLIM3   | up |
| MX2      | up |
| P2RY10   | up |
| ISG15    | up |
| GGTLC2   | up |
| CRIP1    | up |
| SIGLEC1  | up |
| SIPA1L2  | up |
| SLC15A3  | up |
| KLRB1    | up |
| ALDH1L2  | up |
| IRF1     | up |
| IRF5     | up |
| IRF8     | up |
| CSF2RB   | up |
| PANX2    | up |
| PTPRE    | up |
| ADAP2    | up |
| GAB3     | up |
| ITK      | up |
| NPTX1    | up |
| CYBB     | up |
| HLA-DQB2 | up |
| ROR2     | up |
| SPATA18  | up |
| GLDC     | up |
| FCN1     | up |
| CR1      | up |
| TNFRSF1B | up |
| PTPN7    | up |
| PTPN6    | up |

|            |    |
|------------|----|
| S100A4     | up |
| FOXF1      | up |
| SERPINA1   | up |
| CD69       | up |
| CHRD       | up |
| GPR55      | up |
| PAEP       | up |
| HSPB8      | up |
| NCRNA00152 | up |
| IL21R      | up |
| FAM43B     | up |
| CMPK2      | up |
| HPCA       | up |
| RFTN1      | up |
| HTATIP2    | up |
| KCTD17     | up |
| TNFSF13B   | up |
| GLIS3      | up |
| CYP2S1     | up |
| GPBAR1     | up |
| ELMO1      | up |
| AIF1       | up |
| PDCD1      | up |
| KLRD1      | up |
| SLC29A4    | up |
| GPC4       | up |
| HEPH       | up |
| GPR183     | up |
| PIK3CG     | up |
| LOC541471  | up |
| RPS6KA2    | up |
| PTPRCAP    | up |
| PATL2      | up |
| LRRC25     | up |
| ARL11      | up |
| CLIP3      | up |
| MNDA       | up |
| CD48       | up |
| CA12       | up |
| MFSD2A     | up |
| C10orf54   | up |
| NLRP1      | up |
| CSF1R      | up |
| CDCP1      | up |
| XCL2       | up |
| FCGR2B     | up |
| CYTH4      | up |
| PTGS1      | up |
| ACSM5      | up |

|          |    |
|----------|----|
| CDH23    | up |
| FLRT1    | up |
| ARHGAP9  | up |
| SLA      | up |
| MGC12982 | up |
| GMFG     | up |
| IDO1     | up |
| CAMK1D   | up |
| ECM1     | up |
| LYPD1    | up |
| RGS1     | up |
| LOXL3    | up |
| SECTM1   | up |
| CD27     | up |
| IFI30    | up |
| PLA2R1   | up |
| HCST     | up |
| HTRA1    | up |
| CCDC109B | up |
| MAPK10   | up |
| FZD2     | up |
| RASSF5   | up |
| TOX2     | up |
| CSF3R    | up |
| CXCL11   | up |
| CXCL10   | up |
| CXCL13   | up |
| CXCL12   | up |
| TNFRSF4  | up |
| FIBCD1   | up |
| TMSL3    | up |
| IL1RN    | up |
| PRAM1    | up |
| AK5      | up |
| NCKAP1L  | up |
| CXCR2P1  | up |
| AOAH     | up |
| C3AR1    | up |
| SCN1B    | up |
| TSC22D3  | up |
| PLCE1    | up |
| PTGER2   | up |
| SMOC2    | up |
| CYP1B1   | up |
| S1PR4    | up |
| TYMP     | up |
| CTSS     | up |
| CTSW     | up |
| CXCL9    | up |

|          |    |
|----------|----|
| EMB      | up |
| CARD9    | up |
| ADAMTS2  | up |
| GPR65    | up |
| GPR68    | up |
| TMEM37   | up |
| SDS      | up |
| SIGLEC12 | up |
| KCNK6    | up |
| AOC3     | up |
| LYZ      | up |
| SUSD4    | up |
| LY9      | up |
| TNIK     | up |
| HLA-B    | up |
| HLA-F    | up |
| PSTPIP1  | up |
| TFEC     | up |
| VAV1     | up |
| TNFAIP2  | up |
| PRR5L    | up |
| C5orf20  | up |
| GF11     | up |
| TAP1     | up |
| AMZ1     | up |
| SLITRK2  | up |
| SGK1     | up |
| LST1     | up |
| GDF11    | up |
| GZMA     | up |
| GZMB     | up |
| GZMM     | up |
| GZMH     | up |
| GZMK     | up |
| LEF1     | up |
| B4GALNT1 | up |
| ASIP     | up |
| CA8      | up |
| C12orf68 | up |
| FUT7     | up |
| SIGLEC14 | up |
| SIGLEC11 | up |
| SPI1     | up |
| CCL4L2   | up |
| SLAMF6   | up |
| SLAMF1   | up |
| F13A1    | up |
| C6orf105 | up |
| FCRL3    | up |

|              |    |
|--------------|----|
| FCRL6        | up |
| MGAT3        | up |
| MMP9         | up |
| MMP2         | up |
| AMICA1       | up |
| DOCK2        | up |
| ACSBG1       | up |
| SLAMF8       | up |
| GIMAP8       | up |
| GIMAP4       | up |
| GIMAP5       | up |
| GIMAP6       | up |
| GIMAP7       | up |
| GIMAP1       | up |
| WARS         | up |
| LAX1         | up |
| CTNND2       | up |
| ZMYND15      | up |
| CORO1A       | up |
| TRIM9        | up |
| LOC100233209 | up |
| SLC47A1      | up |
| TSPAN5       | up |
| SNX20        | up |
| FSTL4        | up |
| TLR7         | up |
| FCRL5        | up |
| UBD          | up |
| AMN          | up |
| MEFV         | up |
| RASL11B      | up |
| CARD16       | up |
| PDCD1LG2     | up |
| COL9A2       | up |
| COL9A3       | up |
| SEMA6B       | up |
| KCNJ10       | up |
| MMP1         | up |
| C17orf76     | up |
| SLC6A1       | up |
| PECAM1       | up |
| TRPV2        | up |
| COL22A1      | up |
| SLC4A8       | up |
| CIITA        | up |
| LSP1         | up |
| TOX          | up |
| HMOX1        | up |
| IGSF6        | up |



|           |    |
|-----------|----|
| APOL1     | up |
| LCP2      | up |
| LCP1      | up |
| SULF2     | up |
| RASAL3    | up |
| FGR       | up |
| COL5A3    | up |
| COL5A1    | up |
| BAI2      | up |
| HCK       | up |
| HLA-DPB1  | up |
| CHAC1     | up |
| ITGA11    | up |
| PARP8     | up |
| DPYS      | up |
| TUBB3     | up |
| PSMB9     | up |
| SLCO2B1   | up |
| ADRA2A    | up |
| CCR1      | up |
| CCR2      | up |
| CCR5      | up |
| CCR7      | up |
| CD84      | up |
| CD86      | up |
| ZBED2     | up |
| CD8A      | up |
| CD8B      | up |
| RUNX3     | up |
| HLA-DOA   | up |
| HLA-DOB   | up |
| CCDC74A   | up |
| PTPN22    | up |
| SPOCD1    | up |
| NFAM1     | up |
| HLA-DQA1  | up |
| HLA-DQA2  | up |
| SERPINB8  | up |
| HK3       | up |
| MLC1      | up |
| TNF       | up |
| BATF      | up |
| PIK3R5    | up |
| XCL1      | up |
| TNFAIP8L2 | up |
| REEP2     | up |
| CECR1     | up |
| CHRNA1    | up |
| ID3       | up |

|          |    |
|----------|----|
| UBA7     | up |
| SIGLEC8  | up |
| CD5L     | up |
| NBL1     | up |
| SIGLEC7  | up |
| FOLR2    | up |
| LAPTM5   | up |
| B2M      | up |
| SIGLEC5  | up |
| LILRB5   | up |
| LILRB2   | up |
| LILRB1   | up |
| GRAP2    | up |
| C9orf110 | up |
| BIN2     | up |
| DPYD     | up |
| HLA-DMA  | up |
| RHBDL2   | up |
| CD300A   | up |
| MDGA1    | up |
| MYCN     | up |
| IGF2     | up |
| IGF1     | up |
| FLJ42875 | up |
| CD300LF  | up |
| CD300LB  | up |
| PRIMA1   | up |
| NINJ2    | up |
| ARHGAP30 | up |
| CMKLR1   | up |
| PTAFR    | up |
| ATP6V0D2 | up |
| PRDM1    | up |
| PPM1K    | up |
| PLD4     | up |
| NNMT     | up |
| SUSD2    | up |
| PILRA    | up |
| C3       | up |
| KCNJ5    | up |
| KCNJ4    | up |
| AGPAT4   | up |
| COL1A1   | up |
| RCSD1    | up |
| FLI1     | up |
| C19orf35 | up |
| KLHL6    | up |
| BLNK     | up |
| KCNMB4   | up |

|          |    |
|----------|----|
| SOCS2    | up |
| TARP     | up |
| CCNO     | up |
| CCL3L1   | up |
| IL1R2    | up |
| ITPR2    | up |
| CES1     | up |
| ACAN     | up |
| FFAR3    | up |
| DAPP1    | up |
| P2RX1    | up |
| SPNS3    | up |
| IFNG     | up |
| ARHGAP15 | up |
| IL7R     | up |
| FGL2     | up |
| ME1      | up |
| LRMP     | up |
| PGCP     | up |
| SLIT1    | up |
| CCL3     | up |
| NFATC2   | up |
| NFATC4   | up |
| CCL4     | up |
| CCL8     | up |
| GCET2    | up |
| MGLL     | up |
| RASGRF1  | up |
| TRPM2    | up |
| GPR132   | up |
| TBXAS1   | up |
| INPP5D   | up |
| TRAF3IP3 | up |
| TGFBI    | up |
| LCK      | up |
| IL1B     | up |
| LILRB4   | up |
| ADAM23   | up |
| ADAM28   | up |
| IL18     | up |
| GSTM5    | up |
| LTB      | up |
| SSX6     | up |
| SSX4     | up |
| SSX1     | up |
| MS4A7    | up |
| MS4A1    | up |
| FASLG    | up |
| SLC45A1  | up |

|           |    |
|-----------|----|
| CCDC64    | up |
| TMEM119   | up |
| FAM105A   | up |
| WWTR1     | up |
| SORCS1    | up |
| CCL13     | up |
| CCL14     | up |
| CCL18     | up |
| CCL19     | up |
| ALOX15B   | up |
| NTNG2     | up |
| THY1      | up |
| MMP12     | up |
| HLA-DRA   | up |
| PRG2      | up |
| KCNK13    | up |
| SIRPB2    | up |
| P2RY13    | up |
| IFI44L    | up |
| LTA       | up |
| LTF       | up |
| IL32      | up |
| SAMSN1    | up |
| MGC29506  | up |
| EMR1      | up |
| NCF1B     | up |
| TMEM130   | up |
| TMEM155   | up |
| AIM1      | up |
| AIM2      | up |
| IL18BP    | up |
| NOD2      | up |
| HCLS1     | up |
| RNASE6    | up |
| TUBA4A    | up |
| SSX5      | up |
| P2RY6     | up |
| SIGLEC9   | up |
| APBB1IP   | up |
| SYT11     | up |
| GEM       | up |
| GPR171    | up |
| GPR174    | up |
| GPR176    | up |
| UCHL1     | up |
| SP140     | up |
| HSH2D     | up |
| LOC400696 | up |
| CASP1     | up |

|           |    |
|-----------|----|
| PRDM8     | up |
| ALOX5     | up |
| TNFRSF10C | up |
| PROCR     | up |
| NCF2      | up |
| NCF4      | up |
| CNTNAP1   | up |
| APOB48R   | up |
| PAPSS2    | up |
| DPEP2     | up |
| DYSF      | up |
| PPP2R2B   | up |
| GATA6     | up |
| GATA3     | up |
| SH2D1A    | up |
| IPCEF1    | up |
| C4A       | up |
| SNX32     | up |
| ANPEP     | up |
| LAMA1     | up |
| PLAC8     | up |
| CASS4     | up |
| BAALC     | up |
| SLCO5A1   | up |
| APOL6     | up |
| APOL4     | up |
| APOL3     | up |
| C1QC      | up |
| C1QB      | up |
| C1QA      | up |
| TAGAP     | up |
| VSIG4     | up |
| ITGB2     | up |
| PLXDC2    | up |
| PLXDC1    | up |
| ST8SIA4   | up |
| CD74      | up |
| CD70      | up |
| NLRP3     | up |
| BTLA      | up |
| ASCL2     | up |
| LOC606724 | up |
| CD109     | up |
| CD247     | up |
| LILRA5    | up |
| APOC2     | up |
| SELL      | up |
| BST2      | up |
| DOCK11    | up |

|          |    |
|----------|----|
| GPR37L1  | up |
| C1orf162 | up |
| NGFR     | up |
| MCHR1    | up |
| EPSTI1   | up |
| GFRA2    | up |
| FAM113B  | up |
| ZNF385A  | up |
| ISG20    | up |
| CD52     | up |
| CD53     | up |
| KIAA1324 | up |
| RAB31    | up |
| DOK2     | up |
| CD163L1  | up |
| ARMC9    | up |
| CD163    | up |
| IQSEC3   | up |
| DNASE1L3 | up |
| CD40LG   | up |
| TUBB2B   | up |
| MYEOV    | up |
| SLIT3    | up |
| ZNF683   | up |
| SEL1L3   | up |
| NIPAL4   | up |
| CCRL2    | up |
| CHI3L2   | up |
| CHI3L1   | up |
| THEMIS   | up |
| ODZ4     | up |
| ASB2     | up |
| GPR114   | up |
| F2RL3    | up |
| CCL5     | up |
| LAMP3    | up |
| CD38     | up |
| IFI27    | up |
| CD33     | up |
| CD37     | up |
| PSD2     | up |
| TMEM176A | up |
| TMEM176B | up |
| CD3D     | up |
| CD3E     | up |
| CD3G     | up |
| CD209    | up |
| LAIR1    | up |
| HCP5     | up |

|           |    |
|-----------|----|
| ADAMTS14  | up |
| IGSF21    | up |
| RASGRP1   | up |
| FCGR3A    | up |
| ALDH1A1   | up |
| LOC400759 | up |
| CALHM2    | up |
| FAM26F    | up |
| HAVCR2    | up |
| FXYD2     | up |
| ADAM6     | up |
| OLFML3    | up |
| ANKRD22   | up |
| CYTIP     | up |
| TNFRSF9   | up |
| S100A9    | up |
| FHDC1     | up |
| TBC1D10C  | up |
| ABP1      | up |
| TM7SF4    | up |
| CD14      | up |
| GGTA1     | up |
| GADD45G   | up |
| RIMS2     | up |
| GRID1     | up |
| MSR1      | up |
| CERKL     | up |
| BATF3     | up |
| KLHDC7B   | up |
| KLRK1     | up |
| SLC1A3    | up |
| LRRC10B   | up |
| FCGR1B    | up |
| FCGR1A    | up |
| DHRS9     | up |
| DHRS3     | up |
| JAKMIP1   | up |
| GNLY      | up |
| IL15RA    | up |
| SLC2A3    | up |
| SLC46A3   | up |
| LAT2      | up |
| S1PR5     | up |
| COBL      | up |
| TNFSF8    | up |
| NUDT16P1  | up |
| MS4A6A    | up |
| SCML4     | up |
| PKD2L1    | up |

|           |    |
|-----------|----|
| FMO3      | up |
| GBP1      | up |
| FRZB      | up |
| ST8SIA1   | up |
| CD180     | up |
| WAS       | up |
| DPP4      | up |
| A4GALT    | up |
| MPEG1     | up |
| ADAMDEC1  | up |
| CD7       | up |
| SDC2      | up |
| ELN       | up |
| SLC8A1    | up |
| C12orf75  | up |
| PTGIR     | up |
| AHNAK2    | up |
| SQRDL     | up |
| SCN4B     | up |
| MS4A4A    | up |
| ACTA2     | up |
| TSTD1     | up |
| PLN       | up |
| PTGER4    | up |
| KIR2DL4   | up |
| NCF1C     | up |
| HTRA3     | up |
| C17orf87  | up |
| SPIB      | up |
| SLC38A5   | up |
| RASGRP2   | up |
| NLRC5     | up |
| SLC38A3   | up |
| CXCR3     | up |
| CXCR6     | up |
| CXCR5     | up |
| IFI44     | up |
| TREM2     | up |
| THBS2     | up |
| CADM1     | up |
| FGD2      | up |
| CELF2     | up |
| PTGDS     | up |
| NKG7      | up |
| CARD11    | up |
| HCG26     | up |
| RIPK3     | up |
| C20orf103 | up |
| GPR34     | up |



|           |    |
|-----------|----|
| AQP3      | up |
| AQP1      | up |
| ADORA3    | up |
| EPHB2     | up |
| EPHB1     | up |
| TIFAB     | up |
| WDFY4     | up |
| C17orf60  | up |
| DARC      | up |
| PHYHIP    | up |
| CLEC12A   | up |
| PLEK      | up |
| SPOCK2    | up |
| GAD1      | up |
| TMEM150B  | up |
| FEZ1      | up |
| KIF21B    | up |
| BCL11B    | up |
| PALM3     | up |
| UBASH3A   | up |
| C21orf121 | up |
| MAN1C1    | up |
| MYO7A     | up |
| NAPSB     | up |
| TYROBP    | up |
| GPR109A   | up |
| SAMD3     | up |
| EGFLAM    | up |
| GPR18     | up |
| KCNMA1    | up |
| IGJ       | up |
| EBI3      | up |
| SIT1      | up |
| PARVG     | up |
| CXorf21   | up |
| PLEKHG4B  | up |
| SELPLG    | up |
| SPON1     | up |
| TIMP4     | up |
| DKK3      | up |
| LILRA6    | up |
| LILRA4    | up |
| LILRA2    | up |
| ZNF467    | up |
| HPSE      | up |
| OSCAR     | up |
| SORL1     | up |
| CD96      | up |
| CLEC10A   | up |

|          |      |
|----------|------|
| CST7     | up   |
| SKAP1    | up   |
| CSTA     | up   |
| AMIGO2   | up   |
| SLC6A9   | up   |
| TRAT1    | up   |
| LINGO1   | up   |
| TNFRSF8  | up   |
| FCGR1C   | up   |
| RGS18    | up   |
| LY86     | up   |
| CRHBP    | up   |
| ZBP1     | up   |
| MALL     | up   |
| GBP2     | up   |
| GBP5     | up   |
| GBP4     | up   |
| CORO2B   | up   |
| CD4      | up   |
| CD5      | up   |
| CD6      | up   |
| CD2      | up   |
| STAT1    | up   |
| VCAN     | up   |
| ACY3     | up   |
| SIGLEC10 | up   |
| ARC      | up   |
| ABCC3    | up   |
| APLP1    | up   |
| GLI2     | up   |
| MAFB     | up   |
| SLCO3A1  | up   |
| SLC2A6   | up   |
| C9orf109 | up   |
| PLAU     | up   |
| ETV7     | up   |
| IKZF1    | up   |
| IKZF3    | up   |
| IL4I1    | up   |
| FOXD2    | up   |
| ACAP1    | up   |
| GNGT2    | up   |
| C4orf19  | down |
| ZNF285   | down |
| PCDH20   | down |
| TMEM84   | down |
| MPZ      | down |
| CCL28    | down |
| CTF1     | down |

|             |      |
|-------------|------|
| FBXO17      | down |
| KIAA1543    | down |
| ADRA2C      | down |
| HFE         | down |
| CES3        | down |
| TMEM40      | down |
| GNAL        | down |
| ZNF727      | down |
| FAM132A     | down |
| EDNRB       | down |
| ZNF114      | down |
| MUC7        | down |
| IL12RB2     | down |
| TRIM58      | down |
| HILS1       | down |
| LMCD1       | down |
| ZNF676      | down |
| ALDH1L1     | down |
| C13orf35    | down |
| ACSM3       | down |
| PERP        | down |
| ZNF229      | down |
| SLC3A1      | down |
| CKMT1B      | down |
| C6orf142    | down |
| ZNF793      | down |
| PDE3A       | down |
| KCNK2       | down |
| FAM75A2     | down |
| NR6A1       | down |
| FUT3        | down |
| GSTA3       | down |
| DMRT2       | down |
| ZNF826      | down |
| SLC44A3     | down |
| ZNF257      | down |
| TDRD5       | down |
| ASB10       | down |
| SERPINB9    | down |
| CHGB        | down |
| PPAN-P2RY11 | down |
| ABCA17P     | down |
| EPCAM       | down |
| GPR27       | down |
| RNF43       | down |
| ZNF883      | down |
| MTUS1       | down |
| GSTO2       | down |
| ERBB3       | down |

|              |      |
|--------------|------|
| GJB1         | down |
| ZNF560       | down |
| ZNF541       | down |
| ZNF677       | down |
| NEDD9        | down |
| ZNF391       | down |
| LOC100190938 | down |
| PCOLCE2      | down |
| SLC25A21     | down |
| HOMER2       | down |
| ZNF681       | down |
| AZGP1        | down |
| WNK4         | down |
| LOC100270746 | down |
| KREMEN2      | down |
| RAPGEF3      | down |
| ZNF208       | down |
| ZSCAN23      | down |
| LIPH         | down |
| ZNF781       | down |
| ZNF415       | down |
| MYH7         | down |
| CELF5        | down |
| ZNF667       | down |
| STEAP1       | down |
| LINGO2       | down |
| ACSF2        | down |
| PEG3         | down |
| CPS1         | down |
| PLEKHG4      | down |

---
