# Supplementary material for: Identification of prognostic genes in uveal melanoma microenvironment
Source: PubMed Central journal article supplement (PMC7668584; doi:10.1371/journal.pone.0242263), 2020-11-16
Supplement: pone.0242263.s003.pdf [file pone.0242263.s003.pdf]

**S3 Table. 475 genes were significantly predicting the prognosis of UM patients in the training cohort by both Kaplan-Meier and univariate Cox regression analyses (p-value < 0.01).**

| Gene      | Kaplan-Meier analysis (p-value) | Univariate Cox regression analysis |        |        |          |
|-----------|---------------------------------|------------------------------------|--------|--------|----------|
|           |                                 | HR                                 | HR.95L | HR.95H | P-value  |
| ASS1      | 4.48E-05                        | 2.504                              | 1.513  | 4.144  | 3.57E-04 |
| SPN       | 3.36E-05                        | 1.432                              | 1.165  | 1.762  | 6.69E-04 |
| LRRTM2    | 1.40E-05                        | 1.398                              | 1.157  | 1.690  | 5.28E-04 |
| ITGA4     | 6.82E-03                        | 1.295                              | 1.084  | 1.547  | 4.34E-03 |
| ITGA5     | 5.38E-07                        | 3.063                              | 1.869  | 5.021  | 9.02E-06 |
| SDK2      | 2.05E-04                        | 1.523                              | 1.191  | 1.947  | 8.10E-04 |
| ITGAX     | 2.94E-04                        | 1.779                              | 1.342  | 2.359  | 6.14E-05 |
| ITGAL     | 2.00E-03                        | 1.405                              | 1.166  | 1.692  | 3.55E-04 |
| NOV       | 4.43E-03                        | 1.611                              | 1.201  | 2.162  | 1.45E-03 |
| COX4I2    | 9.19E-03                        | 1.567                              | 1.194  | 2.056  | 1.19E-03 |
| CRTAM     | 5.59E-03                        | 1.383                              | 1.133  | 1.687  | 1.40E-03 |
| IL10RA    | 2.20E-03                        | 1.490                              | 1.135  | 1.956  | 4.07E-03 |
| LOC283070 | 6.13E-04                        | 1.352                              | 1.084  | 1.687  | 7.39E-03 |
| C4orf19   | 1.39E-03                        | 0.671                              | 0.530  | 0.849  | 9.19E-04 |
| ZNF285    | 3.01E-03                        | 0.666                              | 0.529  | 0.839  | 5.71E-04 |
| RUNX2     | 7.44E-03                        | 1.703                              | 1.204  | 2.408  | 2.60E-03 |
| IGFBP2    | 4.08E-03                        | 2.116                              | 1.428  | 3.137  | 1.89E-04 |
| FOXL1     | 2.65E-03                        | 2.016                              | 1.359  | 2.990  | 4.90E-04 |
| HLA-DPA1  | 4.80E-04                        | 1.491                              | 1.154  | 1.927  | 2.22E-03 |
| ZAP70     | 1.93E-03                        | 1.364                              | 1.142  | 1.630  | 6.09E-04 |
| PCDH20    | 3.04E-03                        | 0.765                              | 0.662  | 0.885  | 3.20E-04 |
| HLA-DQB1  | 8.85E-03                        | 1.324                              | 1.083  | 1.620  | 6.30E-03 |
| MRC2      | 6.24E-05                        | 1.692                              | 1.281  | 2.236  | 2.14E-04 |
| FOXS1     | 8.91E-03                        | 1.782                              | 1.222  | 2.597  | 2.67E-03 |
| MYO1G     | 1.68E-04                        | 1.876                              | 1.415  | 2.486  | 1.22E-05 |
| MYO1F     | 1.78E-03                        | 1.755                              | 1.219  | 2.526  | 2.49E-03 |
| GALNTL4   | 1.56E-03                        | 1.675                              | 1.241  | 2.259  | 7.36E-04 |
| LGALS3    | 8.67E-03                        | 1.449                              | 1.118  | 1.879  | 5.12E-03 |
| LGALS2    | 5.64E-03                        | 1.391                              | 1.125  | 1.720  | 2.34E-03 |

|          |          |       |       |       |          |
|----------|----------|-------|-------|-------|----------|
| LOC96610 | 6.89E-03 | 1.370 | 1.137 | 1.650 | 9.28E-04 |
| C1orf38  | 1.02E-04 | 2.631 | 1.676 | 4.131 | 2.64E-05 |
| MPZ      | 2.72E-07 | 0.586 | 0.464 | 0.740 | 7.36E-06 |
| SLA2     | 2.34E-04 | 1.432 | 1.187 | 1.726 | 1.73E-04 |
| EVI2B    | 2.53E-04 | 1.449 | 1.120 | 1.875 | 4.77E-03 |
| GRIN2D   | 2.99E-03 | 1.811 | 1.261 | 2.601 | 1.29E-03 |
| BCAT1    | 1.45E-05 | 1.606 | 1.277 | 2.019 | 5.01E-05 |
| NOVA1    | 1.49E-04 | 1.434 | 1.162 | 1.771 | 8.02E-04 |
| CCL28    | 8.26E-03 | 0.519 | 0.336 | 0.802 | 3.10E-03 |
| FAM70A   | 1.24E-03 | 1.522 | 1.237 | 1.873 | 7.31E-05 |
| FAM70B   | 2.14E-03 | 1.623 | 1.195 | 2.204 | 1.93E-03 |
| CTF1     | 7.28E-07 | 0.578 | 0.463 | 0.721 | 1.27E-06 |
| IL2RB    | 2.23E-04 | 1.418 | 1.155 | 1.739 | 8.22E-04 |
| IL2RG    | 2.05E-03 | 1.411 | 1.173 | 1.698 | 2.69E-04 |
| C16orf54 | 4.05E-04 | 1.400 | 1.132 | 1.732 | 1.93E-03 |
| P2RY8    | 6.77E-03 | 2.107 | 1.393 | 3.186 | 4.14E-04 |
| FBXO17   | 5.01E-07 | 0.609 | 0.477 | 0.777 | 6.91E-05 |
| LIF      | 2.00E-03 | 1.455 | 1.152 | 1.838 | 1.64E-03 |
| KIAA1543 | 1.54E-07 | 0.624 | 0.506 | 0.770 | 1.10E-05 |
| ADRA2C   | 7.27E-03 | 0.628 | 0.476 | 0.828 | 9.82E-04 |
| HLA-DRB1 | 8.41E-03 | 1.411 | 1.131 | 1.760 | 2.30E-03 |
| FN1      | 5.02E-03 | 1.873 | 1.324 | 2.649 | 3.88E-04 |
| SYT5     | 4.83E-05 | 1.291 | 1.072 | 1.555 | 6.96E-03 |
| HFE      | 4.73E-05 | 0.584 | 0.456 | 0.748 | 2.11E-05 |
| LAG3     | 4.77E-05 | 1.307 | 1.144 | 1.492 | 8.18E-05 |
| NT5E     | 1.75E-03 | 1.302 | 1.081 | 1.567 | 5.40E-03 |
| TMEM40   | 7.23E-03 | 0.567 | 0.385 | 0.836 | 4.15E-03 |
| MAP1A    | 2.30E-05 | 1.395 | 1.154 | 1.687 | 5.91E-04 |
| VGf      | 8.08E-06 | 1.405 | 1.212 | 1.628 | 6.66E-06 |
| C1S      | 7.11E-03 | 1.418 | 1.129 | 1.782 | 2.66E-03 |
| PRF1     | 2.98E-06 | 1.430 | 1.188 | 1.720 | 1.53E-04 |
| EOMES    | 5.79E-03 | 1.364 | 1.130 | 1.646 | 1.25E-03 |
| ICOS     | 2.07E-03 | 1.395 | 1.154 | 1.687 | 5.85E-04 |

|         |          |       |       |       |          |
|---------|----------|-------|-------|-------|----------|
| ADAM11  | 1.33E-05 | 1.897 | 1.412 | 2.549 | 2.14E-05 |
| ADAM19  | 1.08E-03 | 1.397 | 1.135 | 1.721 | 1.63E-03 |
| SLC16A6 | 6.71E-05 | 1.611 | 1.249 | 2.076 | 2.34E-04 |
| OSR2    | 7.71E-06 | 1.641 | 1.294 | 2.080 | 4.35E-05 |
| ISM1    | 4.53E-06 | 1.522 | 1.264 | 1.834 | 9.80E-06 |
| MFNG    | 1.07E-03 | 1.827 | 1.209 | 2.760 | 4.24E-03 |
| EDNRB   | 3.53E-04 | 0.478 | 0.347 | 0.657 | 5.42E-06 |
| GJA5    | 6.11E-03 | 1.643 | 1.225 | 2.203 | 9.20E-04 |
| PLEKHO1 | 3.38E-03 | 1.963 | 1.336 | 2.886 | 5.99E-04 |
| TIGIT   | 4.87E-05 | 1.330 | 1.140 | 1.551 | 2.84E-04 |
| TM4SF19 | 5.58E-03 | 1.621 | 1.238 | 2.122 | 4.44E-04 |
| LAMB3   | 1.88E-03 | 1.314 | 1.107 | 1.560 | 1.82E-03 |
| GPR162  | 8.82E-07 | 1.321 | 1.091 | 1.598 | 4.27E-03 |
| COX7A1  | 1.30E-03 | 1.585 | 1.185 | 2.119 | 1.91E-03 |
| DLL4    | 8.47E-08 | 2.252 | 1.566 | 3.238 | 1.18E-05 |
| RHOH    | 2.34E-04 | 1.399 | 1.150 | 1.701 | 7.73E-04 |
| IL12RB1 | 4.55E-03 | 1.362 | 1.135 | 1.634 | 8.93E-04 |
| IL12RB2 | 1.17E-06 | 0.742 | 0.636 | 0.865 | 1.43E-04 |
| ADCY1   | 7.55E-05 | 1.327 | 1.131 | 1.558 | 5.19E-04 |
| ADCY2   | 8.95E-04 | 1.300 | 1.098 | 1.539 | 2.32E-03 |
| PDLIM4  | 5.51E-03 | 1.395 | 1.117 | 1.743 | 3.38E-03 |
| BCL3    | 5.84E-05 | 2.697 | 1.637 | 4.442 | 9.76E-05 |
| FBXL7   | 3.81E-03 | 1.666 | 1.208 | 2.297 | 1.85E-03 |
| HTR2B   | 2.73E-04 | 1.358 | 1.174 | 1.570 | 3.58E-05 |
| TLR8    | 2.20E-04 | 1.426 | 1.130 | 1.800 | 2.79E-03 |
| HLA-C   | 6.57E-03 | 1.594 | 1.204 | 2.109 | 1.12E-03 |
| SLC7A7  | 1.23E-03 | 2.146 | 1.441 | 3.195 | 1.70E-04 |
| HILS1   | 1.19E-04 | 0.668 | 0.528 | 0.844 | 7.13E-04 |
| GLIPR2  | 4.73E-03 | 2.216 | 1.358 | 3.616 | 1.45E-03 |
| GGT1    | 3.15E-06 | 1.671 | 1.316 | 2.121 | 2.48E-05 |
| PTPRC   | 3.00E-03 | 1.332 | 1.114 | 1.592 | 1.64E-03 |
| SIRPG   | 5.86E-04 | 1.306 | 1.134 | 1.505 | 2.21E-04 |
| P2RY10  | 5.33E-03 | 1.400 | 1.142 | 1.717 | 1.20E-03 |

|            |          |       |       |       |          |
|------------|----------|-------|-------|-------|----------|
| ISG15      | 8.91E-04 | 1.340 | 1.093 | 1.643 | 4.79E-03 |
| GGTLC2     | 1.84E-08 | 1.708 | 1.328 | 2.197 | 3.05E-05 |
| CRIP1      | 5.28E-05 | 1.515 | 1.197 | 1.918 | 5.56E-04 |
| SIPA1L2    | 9.57E-05 | 1.809 | 1.297 | 2.524 | 4.85E-04 |
| LMCD1      | 1.99E-07 | 0.507 | 0.390 | 0.659 | 4.09E-07 |
| ZNF676     | 2.38E-03 | 0.638 | 0.484 | 0.842 | 1.47E-03 |
| ALDH1L1    | 1.09E-05 | 0.632 | 0.504 | 0.792 | 6.61E-05 |
| IRF1       | 1.83E-04 | 1.488 | 1.225 | 1.807 | 6.23E-05 |
| IRF5       | 2.13E-04 | 3.126 | 1.772 | 5.516 | 8.34E-05 |
| IRF8       | 4.74E-03 | 1.461 | 1.152 | 1.853 | 1.76E-03 |
| CSF2RB     | 2.49E-04 | 1.532 | 1.137 | 2.065 | 5.04E-03 |
| PANX2      | 9.72E-05 | 1.689 | 1.286 | 2.220 | 1.68E-04 |
| PTPRE      | 7.26E-04 | 1.689 | 1.243 | 2.293 | 7.95E-04 |
| GAB3       | 2.03E-04 | 2.146 | 1.472 | 3.130 | 7.29E-05 |
| NPTX1      | 2.32E-03 | 1.307 | 1.112 | 1.536 | 1.17E-03 |
| TNFRSF1B   | 1.02E-03 | 1.816 | 1.320 | 2.497 | 2.43E-04 |
| PTPN7      | 4.56E-04 | 1.411 | 1.175 | 1.695 | 2.27E-04 |
| S100A4     | 2.62E-04 | 1.699 | 1.362 | 2.121 | 2.70E-06 |
| FOXF1      | 2.34E-03 | 1.754 | 1.360 | 2.262 | 1.51E-05 |
| CHRD       | 9.08E-04 | 1.916 | 1.312 | 2.798 | 7.68E-04 |
| GPR55      | 5.24E-04 | 1.516 | 1.192 | 1.929 | 7.03E-04 |
| PAEP       | 1.60E-03 | 1.327 | 1.123 | 1.568 | 9.12E-04 |
| NCRNA00152 | 1.44E-06 | 1.824 | 1.402 | 2.373 | 7.48E-06 |
| IL21R      | 4.58E-03 | 1.392 | 1.150 | 1.686 | 7.06E-04 |
| CMPK2      | 1.11E-04 | 1.432 | 1.133 | 1.809 | 2.63E-03 |
| RFTN1      | 3.25E-04 | 1.816 | 1.262 | 2.613 | 1.31E-03 |
| HTATIP2    | 6.71E-07 | 1.950 | 1.407 | 2.703 | 6.02E-05 |
| KCTD17     | 6.68E-06 | 2.509 | 1.546 | 4.072 | 1.97E-04 |
| TNFSF13B   | 6.58E-03 | 1.433 | 1.157 | 1.774 | 9.63E-04 |
| GLIS3      | 1.62E-03 | 1.682 | 1.251 | 2.262 | 5.71E-04 |
| CYP2S1     | 3.80E-03 | 2.012 | 1.284 | 3.153 | 2.30E-03 |
| GPBAR1     | 6.70E-04 | 1.553 | 1.143 | 2.111 | 4.93E-03 |
| ELMO1      | 9.07E-05 | 1.601 | 1.187 | 2.159 | 2.03E-03 |

|           |          |       |       |       |          |
|-----------|----------|-------|-------|-------|----------|
| AIF1      | 3.10E-04 | 1.577 | 1.142 | 2.178 | 5.62E-03 |
| PDCD1     | 8.56E-06 | 1.352 | 1.158 | 1.578 | 1.33E-04 |
| SLC29A4   | 3.10E-03 | 1.705 | 1.214 | 2.396 | 2.09E-03 |
| GPC4      | 1.20E-05 | 1.716 | 1.309 | 2.248 | 8.98E-05 |
| LOC541471 | 4.24E-06 | 1.832 | 1.370 | 2.451 | 4.54E-05 |
| RPS6KA2   | 1.50E-03 | 1.668 | 1.233 | 2.258 | 9.11E-04 |
| CD48      | 1.45E-03 | 1.423 | 1.152 | 1.759 | 1.07E-03 |
| CA12      | 2.53E-06 | 1.558 | 1.341 | 1.811 | 7.05E-09 |
| MFSD2A    | 2.78E-04 | 1.367 | 1.097 | 1.703 | 5.42E-03 |
| ARHGAP9   | 6.04E-03 | 1.482 | 1.162 | 1.890 | 1.51E-03 |
| ZNF229    | 7.20E-05 | 0.716 | 0.598 | 0.857 | 2.79E-04 |
| SLC3A1    | 3.90E-03 | 0.693 | 0.550 | 0.872 | 1.79E-03 |
| GMFG      | 4.49E-04 | 1.901 | 1.358 | 2.662 | 1.80E-04 |
| IDO1      | 1.42E-04 | 1.256 | 1.106 | 1.427 | 4.51E-04 |
| CAMK1D    | 1.16E-03 | 1.342 | 1.101 | 1.636 | 3.59E-03 |
| ECM1      | 3.75E-04 | 1.622 | 1.295 | 2.032 | 2.58E-05 |
| CD27      | 6.36E-05 | 1.413 | 1.183 | 1.688 | 1.35E-04 |
| PLA2R1    | 8.15E-04 | 1.465 | 1.175 | 1.828 | 7.11E-04 |
| HTRA1     | 4.97E-06 | 1.854 | 1.351 | 2.545 | 1.33E-04 |
| CCDC109B  | 1.35E-03 | 1.605 | 1.212 | 2.126 | 9.72E-04 |
| RASSF5    | 2.49E-05 | 1.590 | 1.210 | 2.090 | 8.87E-04 |
| CXCL11    | 7.60E-03 | 1.363 | 1.127 | 1.649 | 1.41E-03 |
| CXCL10    | 2.37E-03 | 1.293 | 1.115 | 1.499 | 6.50E-04 |
| TMSL3     | 8.89E-03 | 1.635 | 1.147 | 2.331 | 6.60E-03 |
| AK5       | 9.32E-03 | 1.285 | 1.085 | 1.521 | 3.70E-03 |
| CXCR2P1   | 1.53E-04 | 1.303 | 1.129 | 1.505 | 2.96E-04 |
| SCN1B     | 6.49E-06 | 1.735 | 1.260 | 2.388 | 7.28E-04 |
| TSC22D3   | 8.24E-04 | 3.143 | 1.725 | 5.728 | 1.84E-04 |
| C6orf142  | 1.70E-06 | 0.715 | 0.613 | 0.834 | 1.92E-05 |
| SMOC2     | 4.96E-03 | 1.431 | 1.104 | 1.855 | 6.80E-03 |
| S1PR4     | 5.67E-03 | 1.613 | 1.239 | 2.100 | 3.84E-04 |
| TYMP      | 8.08E-06 | 1.855 | 1.375 | 2.502 | 5.15E-05 |
| CTSW      | 1.11E-03 | 1.398 | 1.166 | 1.677 | 3.02E-04 |

|          |          |       |       |       |          |
|----------|----------|-------|-------|-------|----------|
| CXCL9    | 1.23E-05 | 1.296 | 1.139 | 1.475 | 8.57E-05 |
| ADAMTS2  | 3.20E-04 | 1.474 | 1.195 | 1.818 | 2.95E-04 |
| PDE3A    | 3.22E-03 | 0.771 | 0.657 | 0.905 | 1.45E-03 |
| GPR65    | 7.42E-03 | 1.475 | 1.121 | 1.941 | 5.55E-03 |
| GPR68    | 2.36E-03 | 1.666 | 1.227 | 2.264 | 1.09E-03 |
| SDS      | 2.26E-03 | 1.416 | 1.149 | 1.747 | 1.13E-03 |
| SIGLEC12 | 2.66E-05 | 1.744 | 1.343 | 2.265 | 2.98E-05 |
| KCNK6    | 1.99E-03 | 1.978 | 1.309 | 2.990 | 1.21E-03 |
| KCNK2    | 3.14E-04 | 0.704 | 0.574 | 0.863 | 7.42E-04 |
| LYZ      | 1.22E-03 | 1.380 | 1.145 | 1.664 | 7.11E-04 |
| LY9      | 4.31E-05 | 1.603 | 1.284 | 2.000 | 3.01E-05 |
| HLA-B    | 9.25E-04 | 1.491 | 1.189 | 1.869 | 5.30E-04 |
| PSTPIP1  | 1.21E-04 | 1.757 | 1.314 | 2.348 | 1.42E-04 |
| FAM75A2  | 1.71E-04 | 0.675 | 0.537 | 0.849 | 7.93E-04 |
| TNFAIP2  | 7.42E-04 | 1.942 | 1.383 | 2.728 | 1.27E-04 |
| NR6A1    | 5.57E-06 | 0.502 | 0.359 | 0.701 | 5.52E-05 |
| PRR5L    | 3.39E-04 | 2.050 | 1.490 | 2.819 | 1.03E-05 |
| C5orf20  | 3.12E-03 | 1.463 | 1.188 | 1.801 | 3.43E-04 |
| AMZ1     | 3.06E-06 | 1.690 | 1.325 | 2.156 | 2.36E-05 |
| SLITRK2  | 1.28E-04 | 1.378 | 1.143 | 1.661 | 7.86E-04 |
| SGK1     | 4.06E-04 | 1.346 | 1.074 | 1.688 | 9.99E-03 |
| LST1     | 9.93E-03 | 1.599 | 1.191 | 2.147 | 1.77E-03 |
| GDF11    | 1.11E-03 | 1.915 | 1.348 | 2.721 | 2.88E-04 |
| GZMA     | 5.28E-05 | 1.380 | 1.175 | 1.622 | 9.04E-05 |
| GZMB     | 2.47E-07 | 1.482 | 1.236 | 1.776 | 2.06E-05 |
| GZMH     | 9.03E-04 | 1.522 | 1.236 | 1.873 | 7.41E-05 |
| GZMK     | 2.66E-04 | 1.290 | 1.128 | 1.476 | 2.10E-04 |
| LEF1     | 6.36E-05 | 1.680 | 1.272 | 2.220 | 2.58E-04 |
| B4GALNT1 | 2.38E-05 | 1.440 | 1.187 | 1.747 | 2.20E-04 |
| CA8      | 6.99E-04 | 1.352 | 1.166 | 1.567 | 6.29E-05 |
| FUT3     | 2.95E-04 | 0.649 | 0.506 | 0.833 | 6.79E-04 |
| GSTA3    | 9.91E-07 | 0.731 | 0.627 | 0.851 | 5.64E-05 |
| DMRT2    | 1.30E-03 | 0.692 | 0.568 | 0.843 | 2.62E-04 |

|          |          |       |       |       |          |
|----------|----------|-------|-------|-------|----------|
| ZNF826   | 2.35E-03 | 0.551 | 0.399 | 0.760 | 2.83E-04 |
| CCL4L2   | 6.63E-05 | 1.473 | 1.190 | 1.823 | 3.70E-04 |
| SLAMF6   | 2.26E-03 | 1.370 | 1.145 | 1.638 | 5.77E-04 |
| SLAMF1   | 1.41E-03 | 1.455 | 1.170 | 1.810 | 7.49E-04 |
| FCRL3    | 7.12E-03 | 1.281 | 1.080 | 1.519 | 4.42E-03 |
| FCRL6    | 1.31E-03 | 1.521 | 1.218 | 1.900 | 2.12E-04 |
| MMP2     | 9.59E-04 | 1.466 | 1.146 | 1.875 | 2.31E-03 |
| AMICA1   | 1.36E-03 | 1.678 | 1.259 | 2.235 | 4.10E-04 |
| SLAMF8   | 4.20E-03 | 1.506 | 1.194 | 1.899 | 5.48E-04 |
| GIMAP8   | 2.21E-04 | 1.908 | 1.255 | 2.903 | 2.53E-03 |
| GIMAP4   | 2.09E-05 | 1.646 | 1.229 | 2.206 | 8.42E-04 |
| GIMAP6   | 4.28E-03 | 1.658 | 1.184 | 2.321 | 3.24E-03 |
| GIMAP1   | 5.46E-03 | 1.702 | 1.204 | 2.405 | 2.60E-03 |
| WARS     | 6.31E-06 | 1.714 | 1.348 | 2.178 | 1.07E-05 |
| LAX1     | 5.41E-04 | 1.459 | 1.179 | 1.806 | 5.13E-04 |
| SLC44A3  | 1.60E-07 | 0.467 | 0.347 | 0.630 | 5.80E-07 |
| CORO1A   | 2.12E-03 | 1.529 | 1.171 | 1.996 | 1.79E-03 |
| SLC47A1  | 1.24E-07 | 2.238 | 1.532 | 3.269 | 3.12E-05 |
| FSTL4    | 5.42E-04 | 1.594 | 1.198 | 2.120 | 1.36E-03 |
| UBD      | 9.99E-03 | 1.298 | 1.123 | 1.499 | 3.99E-04 |
| AMN      | 1.55E-04 | 1.858 | 1.389 | 2.485 | 3.01E-05 |
| RASL11B  | 2.36E-03 | 1.495 | 1.176 | 1.901 | 1.02E-03 |
| COL9A3   | 2.76E-05 | 1.517 | 1.239 | 1.857 | 5.53E-05 |
| SEMA6B   | 3.93E-03 | 1.704 | 1.225 | 2.371 | 1.56E-03 |
| MMP1     | 6.67E-04 | 1.515 | 1.218 | 1.885 | 1.90E-04 |
| C17orf76 | 7.46E-05 | 2.708 | 1.715 | 4.275 | 1.91E-05 |
| PECAM1   | 1.18E-03 | 2.852 | 1.701 | 4.782 | 7.01E-05 |
| TRPV2    | 2.11E-05 | 1.762 | 1.303 | 2.384 | 2.39E-04 |
| COL22A1  | 6.33E-03 | 1.260 | 1.089 | 1.458 | 1.87E-03 |
| CIITA    | 3.55E-03 | 1.349 | 1.085 | 1.678 | 7.08E-03 |
| HMOX1    | 3.38E-04 | 2.140 | 1.500 | 3.052 | 2.68E-05 |
| APOL1    | 1.77E-03 | 1.319 | 1.124 | 1.549 | 7.14E-04 |
| LCP2     | 1.03E-05 | 1.517 | 1.187 | 1.939 | 8.75E-04 |

|           |          |       |       |       |          |
|-----------|----------|-------|-------|-------|----------|
| LCP1      | 2.38E-03 | 1.516 | 1.181 | 1.946 | 1.10E-03 |
| SULF2     | 9.57E-07 | 2.184 | 1.534 | 3.108 | 1.45E-05 |
| RASAL3    | 1.45E-05 | 1.506 | 1.206 | 1.881 | 3.00E-04 |
| COL5A3    | 9.79E-03 | 1.558 | 1.213 | 1.999 | 5.06E-04 |
| BAI2      | 7.12E-04 | 1.433 | 1.160 | 1.769 | 8.41E-04 |
| HCK       | 4.02E-03 | 1.700 | 1.231 | 2.349 | 1.28E-03 |
| CHAC1     | 5.74E-07 | 1.669 | 1.319 | 2.112 | 2.00E-05 |
| PARP8     | 8.59E-06 | 2.023 | 1.460 | 2.803 | 2.27E-05 |
| DPYS      | 6.98E-05 | 1.523 | 1.218 | 1.905 | 2.28E-04 |
| TUBB3     | 3.40E-04 | 1.520 | 1.143 | 2.023 | 4.00E-03 |
| CCR5      | 1.42E-03 | 1.337 | 1.109 | 1.613 | 2.39E-03 |
| CD86      | 1.67E-03 | 1.548 | 1.155 | 2.073 | 3.41E-03 |
| ZBED2     | 4.70E-03 | 1.383 | 1.146 | 1.669 | 7.37E-04 |
| CD8A      | 2.79E-05 | 1.295 | 1.128 | 1.487 | 2.41E-04 |
| CD8B      | 1.63E-04 | 1.312 | 1.138 | 1.512 | 1.79E-04 |
| HLA-DOA   | 2.30E-03 | 1.389 | 1.104 | 1.747 | 5.02E-03 |
| CCDC74A   | 5.49E-04 | 2.492 | 1.653 | 3.757 | 1.29E-05 |
| PTPN22    | 3.05E-04 | 1.442 | 1.177 | 1.765 | 3.99E-04 |
| SERPINB9  | 1.09E-04 | 0.560 | 0.447 | 0.701 | 4.25E-07 |
| SERPINB8  | 7.83E-05 | 2.370 | 1.546 | 3.633 | 7.48E-05 |
| HK3       | 3.52E-03 | 1.537 | 1.163 | 2.032 | 2.52E-03 |
| BATF      | 5.45E-03 | 1.398 | 1.139 | 1.715 | 1.32E-03 |
| TNFAIP8L2 | 6.21E-05 | 1.714 | 1.252 | 2.347 | 7.77E-04 |
| CHGB      | 2.63E-03 | 0.724 | 0.606 | 0.864 | 3.60E-04 |
| CD5L      | 4.40E-07 | 1.246 | 1.094 | 1.419 | 9.36E-04 |
| LAPTM5    | 1.84E-03 | 1.616 | 1.211 | 2.157 | 1.12E-03 |
| B2M       | 9.52E-05 | 1.732 | 1.314 | 2.283 | 9.52E-05 |
| LILRB5    | 2.97E-03 | 1.560 | 1.157 | 2.103 | 3.55E-03 |
| LILRB2    | 6.59E-04 | 1.526 | 1.172 | 1.988 | 1.71E-03 |
| GRAP2     | 1.16E-05 | 1.630 | 1.296 | 2.050 | 2.95E-05 |
| ABCA17P   | 1.20E-04 | 0.638 | 0.484 | 0.842 | 1.48E-03 |
| C9orf110  | 4.21E-03 | 1.451 | 1.104 | 1.908 | 7.69E-03 |
| BIN2      | 3.87E-05 | 1.508 | 1.185 | 1.917 | 8.20E-04 |



|          |          |       |       |       |          |
|----------|----------|-------|-------|-------|----------|
| RHBDL2   | 2.78E-03 | 1.760 | 1.264 | 2.452 | 8.23E-04 |
| CD300A   | 2.13E-04 | 1.591 | 1.211 | 2.091 | 8.62E-04 |
| MDGA1    | 9.29E-03 | 1.590 | 1.211 | 2.088 | 8.35E-04 |
| MYCN     | 1.14E-03 | 1.688 | 1.238 | 2.302 | 9.33E-04 |
| CD300LF  | 1.33E-03 | 1.598 | 1.246 | 2.050 | 2.19E-04 |
| NINJ2    | 3.05E-05 | 1.907 | 1.329 | 2.738 | 4.65E-04 |
| ATP6V0D2 | 9.49E-04 | 1.294 | 1.105 | 1.516 | 1.41E-03 |
| PRDM1    | 4.32E-04 | 1.758 | 1.283 | 2.409 | 4.45E-04 |
| PPM1K    | 2.01E-07 | 2.353 | 1.536 | 3.604 | 8.36E-05 |
| SUSD2    | 1.13E-05 | 1.612 | 1.240 | 2.097 | 3.67E-04 |
| KCNJ4    | 3.71E-05 | 1.433 | 1.158 | 1.775 | 9.54E-04 |
| AGPAT4   | 4.20E-04 | 1.807 | 1.314 | 2.484 | 2.70E-04 |
| RCSD1    | 1.39E-04 | 1.680 | 1.187 | 2.377 | 3.40E-03 |
| FLI1     | 3.36E-03 | 2.098 | 1.406 | 3.131 | 2.88E-04 |
| GPR27    | 4.98E-05 | 0.670 | 0.530 | 0.846 | 7.75E-04 |
| SOCS2    | 1.19E-06 | 1.809 | 1.352 | 2.419 | 6.54E-05 |
| CCNO     | 7.58E-04 | 1.791 | 1.280 | 2.506 | 6.71E-04 |
| IL1R2    | 1.98E-05 | 1.626 | 1.280 | 2.066 | 6.87E-05 |
| RNF43    | 5.32E-07 | 0.546 | 0.420 | 0.709 | 5.75E-06 |
| ITPR2    | 2.00E-03 | 1.612 | 1.244 | 2.088 | 3.02E-04 |
| FFAR3    | 5.22E-06 | 1.460 | 1.197 | 1.781 | 1.86E-04 |
| ZNF883   | 7.68E-06 | 0.606 | 0.478 | 0.769 | 3.61E-05 |
| IFNG     | 6.57E-03 | 1.372 | 1.134 | 1.660 | 1.13E-03 |
| MTUS1    | 2.61E-06 | 0.514 | 0.389 | 0.679 | 2.77E-06 |
| GSTO2    | 1.89E-05 | 0.591 | 0.436 | 0.801 | 6.98E-04 |
| ME1      | 1.47E-05 | 1.506 | 1.214 | 1.868 | 1.94E-04 |
| ERBB3    | 5.16E-07 | 0.662 | 0.517 | 0.847 | 1.06E-03 |
| SLIT1    | 2.83E-04 | 1.359 | 1.120 | 1.648 | 1.89E-03 |
| ZNF560   | 1.74E-04 | 0.649 | 0.495 | 0.849 | 1.64E-03 |
| CCL3     | 6.26E-04 | 1.588 | 1.227 | 2.056 | 4.43E-04 |
| NFATC2   | 5.78E-03 | 1.505 | 1.129 | 2.007 | 5.33E-03 |
| NFATC4   | 2.37E-03 | 1.796 | 1.289 | 2.501 | 5.34E-04 |
| CCL4     | 1.67E-04 | 1.452 | 1.195 | 1.765 | 1.74E-04 |

|              |          |       |       |       |          |
|--------------|----------|-------|-------|-------|----------|
| GCET2        | 2.59E-03 | 1.464 | 1.136 | 1.887 | 3.26E-03 |
| MGLL         | 2.14E-03 | 1.718 | 1.382 | 2.137 | 1.13E-06 |
| TRPM2        | 2.12E-03 | 1.657 | 1.244 | 2.207 | 5.59E-04 |
| TGFBI        | 3.38E-05 | 1.949 | 1.360 | 2.793 | 2.80E-04 |
| LCK          | 2.11E-04 | 1.345 | 1.153 | 1.569 | 1.57E-04 |
| ADAM23       | 7.55E-03 | 1.391 | 1.135 | 1.705 | 1.45E-03 |
| LTB          | 2.83E-04 | 1.417 | 1.178 | 1.705 | 2.14E-04 |
| ZNF541       | 3.14E-04 | 0.548 | 0.393 | 0.764 | 3.85E-04 |
| SSX1         | 5.60E-04 | 1.267 | 1.109 | 1.447 | 4.94E-04 |
| FASLG        | 2.48E-03 | 1.352 | 1.142 | 1.600 | 4.51E-04 |
| CCDC64       | 1.82E-07 | 1.297 | 1.088 | 1.547 | 3.69E-03 |
| FAM105A      | 1.97E-04 | 2.143 | 1.489 | 3.084 | 4.04E-05 |
| WWTR1        | 9.30E-03 | 1.559 | 1.149 | 2.116 | 4.37E-03 |
| CCL18        | 2.90E-03 | 1.271 | 1.094 | 1.477 | 1.71E-03 |
| ZNF677       | 7.96E-04 | 0.489 | 0.343 | 0.698 | 8.15E-05 |
| MMP12        | 1.06E-06 | 1.420 | 1.240 | 1.626 | 3.94E-07 |
| PRG2         | 7.64E-03 | 1.489 | 1.124 | 1.973 | 5.47E-03 |
| NEDD9        | 7.30E-07 | 0.476 | 0.338 | 0.670 | 2.10E-05 |
| LTA          | 6.28E-03 | 1.541 | 1.198 | 1.983 | 7.65E-04 |
| IL32         | 1.46E-04 | 1.548 | 1.255 | 1.909 | 4.33E-05 |
| ZNF391       | 5.05E-06 | 0.552 | 0.424 | 0.718 | 9.69E-06 |
| SAMSN1       | 7.70E-03 | 1.320 | 1.085 | 1.606 | 5.59E-03 |
| MGC29506     | 9.80E-03 | 1.270 | 1.091 | 1.479 | 2.06E-03 |
| EMR1         | 5.43E-05 | 1.506 | 1.172 | 1.934 | 1.36E-03 |
| AIM2         | 4.17E-03 | 1.347 | 1.114 | 1.629 | 2.16E-03 |
| RNASE6       | 6.34E-04 | 1.643 | 1.165 | 2.317 | 4.62E-03 |
| SSX5         | 2.94E-07 | 1.294 | 1.148 | 1.458 | 2.42E-05 |
| P2RY6        | 1.76E-03 | 1.561 | 1.185 | 2.055 | 1.52E-03 |
| GEM          | 5.65E-06 | 1.682 | 1.315 | 2.151 | 3.44E-05 |
| LOC100190938 | 9.22E-05 | 0.615 | 0.488 | 0.775 | 3.75E-05 |
| UCHL1        | 1.03E-04 | 1.365 | 1.104 | 1.689 | 4.13E-03 |
| CASP1        | 5.55E-03 | 1.512 | 1.160 | 1.970 | 2.24E-03 |
| NCF4         | 1.11E-03 | 1.799 | 1.281 | 2.525 | 7.00E-04 |

|          |          |       |       |       |          |
|----------|----------|-------|-------|-------|----------|
| PCOLCE2  | 1.89E-04 | 0.631 | 0.499 | 0.797 | 1.12E-04 |
| CNTNAP1  | 4.63E-04 | 1.891 | 1.289 | 2.773 | 1.11E-03 |
| PAPSS2   | 4.27E-05 | 2.846 | 1.762 | 4.596 | 1.89E-05 |
| DYSF     | 1.21E-04 | 1.634 | 1.239 | 2.155 | 5.12E-04 |
| GATA6    | 2.26E-05 | 1.770 | 1.339 | 2.338 | 5.93E-05 |
| SH2D1A   | 5.47E-04 | 1.334 | 1.137 | 1.564 | 3.95E-04 |
| C4A      | 5.52E-03 | 1.342 | 1.097 | 1.642 | 4.27E-03 |
| ANPEP    | 2.59E-06 | 2.071 | 1.544 | 2.778 | 1.16E-06 |
| LAMA1    | 2.76E-05 | 1.833 | 1.412 | 2.379 | 5.24E-06 |
| SLCO5A1  | 5.25E-04 | 1.512 | 1.241 | 1.843 | 4.07E-05 |
| APOL4    | 1.70E-03 | 1.414 | 1.151 | 1.738 | 9.92E-04 |
| APOL3    | 1.90E-04 | 1.381 | 1.155 | 1.651 | 3.95E-04 |
| ST8SIA4  | 3.00E-03 | 1.543 | 1.186 | 2.008 | 1.24E-03 |
| CD74     | 4.25E-03 | 1.489 | 1.173 | 1.891 | 1.09E-03 |
| CD70     | 8.18E-03 | 1.227 | 1.051 | 1.433 | 9.81E-03 |
| CD247    | 3.66E-04 | 1.424 | 1.176 | 1.724 | 2.98E-04 |
| LILRA5   | 6.93E-03 | 1.478 | 1.103 | 1.980 | 8.84E-03 |
| SLC25A21 | 8.75E-03 | 0.671 | 0.510 | 0.883 | 4.44E-03 |
| DOCK11   | 1.22E-03 | 1.650 | 1.204 | 2.262 | 1.84E-03 |
| GFRA2    | 3.91E-04 | 1.352 | 1.087 | 1.683 | 6.87E-03 |
| FAM113B  | 6.64E-03 | 1.480 | 1.152 | 1.902 | 2.16E-03 |
| ISG20    | 3.91E-07 | 2.027 | 1.511 | 2.720 | 2.44E-06 |
| CD52     | 5.17E-03 | 1.469 | 1.181 | 1.826 | 5.45E-04 |
| CD53     | 2.65E-03 | 1.479 | 1.129 | 1.937 | 4.46E-03 |
| RAB31    | 3.64E-05 | 2.394 | 1.590 | 3.607 | 2.94E-05 |
| CD163L1  | 1.15E-03 | 1.604 | 1.260 | 2.042 | 1.24E-04 |
| ARMC9    | 4.51E-06 | 2.517 | 1.673 | 3.787 | 9.49E-06 |
| CD40LG   | 9.29E-03 | 1.515 | 1.166 | 1.968 | 1.85E-03 |
| MYEOV    | 3.50E-05 | 1.403 | 1.197 | 1.645 | 2.93E-05 |
| HOMER2   | 5.38E-03 | 0.615 | 0.458 | 0.825 | 1.17E-03 |
| SEL1L3   | 3.56E-06 | 1.506 | 1.226 | 1.850 | 9.54E-05 |
| GPR114   | 2.02E-03 | 1.605 | 1.197 | 2.150 | 1.54E-03 |
| AZGP1    | 9.60E-06 | 0.633 | 0.513 | 0.780 | 1.79E-05 |

|              |          |       |       |       |          |
|--------------|----------|-------|-------|-------|----------|
| F2RL3        | 1.21E-04 | 2.425 | 1.608 | 3.657 | 2.36E-05 |
| CCL5         | 4.91E-03 | 1.448 | 1.202 | 1.746 | 1.01E-04 |
| CD38         | 6.73E-03 | 1.334 | 1.097 | 1.621 | 3.79E-03 |
| IFI27        | 3.87E-04 | 1.289 | 1.115 | 1.491 | 6.03E-04 |
| PSD2         | 6.05E-05 | 1.396 | 1.177 | 1.656 | 1.32E-04 |
| WNK4         | 7.12E-06 | 0.794 | 0.681 | 0.927 | 3.47E-03 |
| CD3D         | 8.99E-05 | 1.323 | 1.149 | 1.523 | 9.68E-05 |
| CD3E         | 1.89E-03 | 1.341 | 1.144 | 1.572 | 2.90E-04 |
| CD3G         | 1.56E-03 | 1.346 | 1.128 | 1.605 | 9.50E-04 |
| CD209        | 1.48E-05 | 1.559 | 1.206 | 2.014 | 6.93E-04 |
| HCP5         | 1.86E-03 | 1.427 | 1.195 | 1.705 | 8.84E-05 |
| ADAMTS14     | 1.73E-04 | 1.624 | 1.278 | 2.064 | 7.40E-05 |
| RASGRP1      | 2.31E-03 | 1.230 | 1.053 | 1.437 | 8.91E-03 |
| LOC100270746 | 1.80E-03 | 0.480 | 0.330 | 0.697 | 1.17E-04 |
| LOC400759    | 3.85E-03 | 1.261 | 1.079 | 1.473 | 3.51E-03 |
| CALHM2       | 4.16E-07 | 3.264 | 1.830 | 5.823 | 6.16E-05 |
| FAM26F       | 3.76E-03 | 1.307 | 1.093 | 1.563 | 3.34E-03 |
| HAVCR2       | 7.70E-04 | 1.484 | 1.108 | 1.987 | 8.10E-03 |
| FXVD2        | 3.08E-03 | 1.381 | 1.134 | 1.682 | 1.31E-03 |
| KREMEN2      | 7.26E-04 | 0.662 | 0.510 | 0.858 | 1.84E-03 |
| CYTIP        | 2.16E-04 | 1.525 | 1.227 | 1.895 | 1.40E-04 |
| FHDC1        | 4.13E-03 | 1.423 | 1.102 | 1.839 | 6.90E-03 |
| TBC1D10C     | 2.07E-05 | 1.437 | 1.187 | 1.739 | 2.03E-04 |
| TM7SF4       | 6.20E-04 | 1.298 | 1.129 | 1.493 | 2.57E-04 |
| GADD45G      | 5.20E-05 | 1.396 | 1.142 | 1.707 | 1.13E-03 |
| RIMS2        | 5.85E-05 | 1.242 | 1.116 | 1.381 | 7.13E-05 |
| GRID1        | 2.41E-04 | 1.633 | 1.240 | 2.150 | 4.80E-04 |
| BATF3        | 2.34E-05 | 2.507 | 1.666 | 3.772 | 1.04E-05 |
| KLRK1        | 2.17E-03 | 1.348 | 1.133 | 1.603 | 7.50E-04 |
| GPLY         | 3.27E-03 | 1.462 | 1.165 | 1.835 | 1.06E-03 |
| IL15RA       | 2.62E-03 | 1.629 | 1.211 | 2.192 | 1.26E-03 |
| SLC2A3       | 1.48E-03 | 1.529 | 1.168 | 2.001 | 1.98E-03 |
| S1PR5        | 4.13E-03 | 1.930 | 1.286 | 2.896 | 1.50E-03 |

|          |          |       |       |       |          |
|----------|----------|-------|-------|-------|----------|
| RAPGEF3  | 2.97E-06 | 0.550 | 0.407 | 0.743 | 9.84E-05 |
| SCML4    | 7.98E-04 | 1.511 | 1.197 | 1.907 | 5.12E-04 |
| ZNF208   | 5.44E-04 | 0.770 | 0.640 | 0.927 | 5.63E-03 |
| GBP1     | 6.56E-04 | 1.259 | 1.106 | 1.434 | 5.07E-04 |
| ST8SIA1  | 5.82E-04 | 1.474 | 1.202 | 1.808 | 1.94E-04 |
| WAS      | 1.61E-03 | 1.597 | 1.181 | 2.160 | 2.39E-03 |
| A4GALT   | 4.77E-04 | 1.867 | 1.244 | 2.803 | 2.60E-03 |
| ZNF781   | 1.32E-04 | 0.745 | 0.598 | 0.928 | 8.76E-03 |
| MPEG1    | 4.65E-04 | 1.686 | 1.202 | 2.367 | 2.51E-03 |
| ADAMDEC1 | 3.75E-08 | 1.343 | 1.164 | 1.550 | 5.48E-05 |
| CD7      | 4.95E-04 | 1.472 | 1.217 | 1.780 | 6.66E-05 |
| SDC2     | 1.24E-03 | 1.529 | 1.215 | 1.924 | 2.98E-04 |
| SLC8A1   | 4.94E-04 | 1.393 | 1.146 | 1.693 | 8.83E-04 |
| C12orf75 | 9.23E-06 | 1.611 | 1.245 | 2.083 | 2.81E-04 |
| AHNAK2   | 5.49E-05 | 1.714 | 1.259 | 2.332 | 6.13E-04 |
| SCN4B    | 1.25E-05 | 1.659 | 1.269 | 2.169 | 2.13E-04 |
| PLN      | 2.43E-04 | 1.260 | 1.115 | 1.424 | 2.09E-04 |
| NCF1C    | 5.83E-03 | 1.463 | 1.148 | 1.864 | 2.11E-03 |
| HTRA3    | 1.59E-06 | 1.845 | 1.385 | 2.459 | 2.90E-05 |
| SPIB     | 2.15E-03 | 1.569 | 1.207 | 2.039 | 7.52E-04 |
| RASGRP2  | 4.73E-04 | 1.784 | 1.318 | 2.414 | 1.76E-04 |
| NLRC5    | 3.63E-03 | 1.526 | 1.216 | 1.914 | 2.65E-04 |
| CXCR3    | 4.47E-03 | 1.351 | 1.142 | 1.598 | 4.55E-04 |
| CXCR6    | 3.37E-03 | 1.330 | 1.126 | 1.570 | 7.80E-04 |
| ZNF415   | 1.53E-05 | 0.696 | 0.583 | 0.831 | 5.93E-05 |
| MYH7     | 8.52E-04 | 0.617 | 0.480 | 0.792 | 1.53E-04 |
| THBS2    | 1.60E-03 | 1.597 | 1.282 | 1.990 | 2.95E-05 |
| CELF5    | 1.63E-06 | 0.559 | 0.421 | 0.740 | 5.16E-05 |
| CADM1    | 2.03E-06 | 1.469 | 1.209 | 1.786 | 1.10E-04 |
| FGD2     | 1.08E-03 | 1.496 | 1.115 | 2.007 | 7.25E-03 |
| CELF2    | 1.26E-05 | 1.766 | 1.318 | 2.367 | 1.41E-04 |
| NKG7     | 5.13E-05 | 1.404 | 1.181 | 1.668 | 1.18E-04 |
| CARD11   | 5.30E-08 | 1.741 | 1.354 | 2.239 | 1.57E-05 |

|          |          |       |       |       |          |
|----------|----------|-------|-------|-------|----------|
| HCG26    | 3.56E-04 | 1.402 | 1.179 | 1.669 | 1.37E-04 |
| ZNF667   | 2.36E-07 | 0.645 | 0.527 | 0.789 | 1.93E-05 |
| AQP3     | 5.06E-04 | 1.733 | 1.298 | 2.314 | 1.92E-04 |
| AQP1     | 1.91E-03 | 1.654 | 1.189 | 2.302 | 2.83E-03 |
| EPHB2    | 3.77E-04 | 1.377 | 1.093 | 1.736 | 6.75E-03 |
| C17orf60 | 8.22E-03 | 1.808 | 1.249 | 2.618 | 1.70E-03 |
| PHYHIP   | 5.41E-03 | 1.362 | 1.097 | 1.692 | 5.09E-03 |
| CLEC12A  | 2.87E-04 | 1.496 | 1.206 | 1.855 | 2.47E-04 |
| TMEM150B | 1.93E-05 | 1.627 | 1.260 | 2.101 | 1.93E-04 |
| FEZ1     | 5.37E-05 | 1.476 | 1.168 | 1.865 | 1.11E-03 |
| STEAP1   | 5.17E-03 | 0.607 | 0.448 | 0.821 | 1.19E-03 |
| BCL11B   | 1.71E-04 | 1.500 | 1.229 | 1.829 | 6.36E-05 |
| PALM3    | 4.32E-06 | 1.383 | 1.113 | 1.719 | 3.44E-03 |
| UBASH3A  | 3.73E-03 | 1.359 | 1.132 | 1.631 | 9.76E-04 |
| MAN1C1   | 1.07E-03 | 1.648 | 1.179 | 2.303 | 3.42E-03 |
| SIT1     | 5.02E-04 | 1.365 | 1.155 | 1.614 | 2.59E-04 |
| PARVG    | 1.52E-04 | 1.503 | 1.158 | 1.952 | 2.23E-03 |
| PLEKHG4B | 5.75E-06 | 2.117 | 1.527 | 2.935 | 6.83E-06 |
| ZNF467   | 6.70E-07 | 1.584 | 1.210 | 2.073 | 8.20E-04 |
| HPSE     | 1.98E-05 | 1.640 | 1.294 | 2.079 | 4.35E-05 |
| SORL1    | 9.50E-04 | 1.516 | 1.216 | 1.891 | 2.18E-04 |
| CD96     | 5.46E-06 | 1.384 | 1.157 | 1.656 | 3.73E-04 |
| SKAP1    | 5.39E-03 | 1.386 | 1.137 | 1.689 | 1.24E-03 |
| TRAT1    | 9.05E-05 | 1.388 | 1.159 | 1.662 | 3.57E-04 |
| LINGO2   | 4.89E-05 | 0.621 | 0.486 | 0.793 | 1.33E-04 |
| LINGO1   | 8.22E-03 | 2.132 | 1.403 | 3.242 | 3.96E-04 |
| TNFRSF8  | 1.05E-05 | 1.525 | 1.214 | 1.916 | 2.85E-04 |
| MALL     | 7.91E-03 | 1.409 | 1.117 | 1.777 | 3.76E-03 |
| GBP2     | 8.89E-03 | 1.264 | 1.079 | 1.481 | 3.68E-03 |
| ACSF2    | 2.32E-06 | 0.669 | 0.533 | 0.839 | 4.93E-04 |
| GBP5     | 1.23E-03 | 1.257 | 1.094 | 1.443 | 1.21E-03 |
| GBP4     | 8.72E-03 | 1.355 | 1.123 | 1.635 | 1.53E-03 |
| CD6      | 3.23E-04 | 1.790 | 1.371 | 2.338 | 1.92E-05 |

|          |          |       |       |       |          |
|----------|----------|-------|-------|-------|----------|
| CD2      | 4.72E-05 | 1.320 | 1.141 | 1.526 | 1.84E-04 |
| VCAN     | 5.77E-03 | 1.571 | 1.160 | 2.127 | 3.48E-03 |
| PEG3     | 6.14E-04 | 0.738 | 0.629 | 0.865 | 1.81E-04 |
| ACY3     | 1.70E-03 | 1.421 | 1.096 | 1.843 | 8.01E-03 |
| SIGLEC10 | 1.74E-03 | 1.388 | 1.127 | 1.709 | 2.01E-03 |
| ARC      | 2.00E-03 | 1.649 | 1.321 | 2.059 | 1.01E-05 |
| GLI2     | 4.95E-05 | 1.872 | 1.349 | 2.598 | 1.76E-04 |
| MAFB     | 3.34E-04 | 2.113 | 1.408 | 3.173 | 3.08E-04 |
| SLCO3A1  | 1.72E-05 | 2.166 | 1.484 | 3.161 | 6.18E-05 |
| SLC2A6   | 7.20E-04 | 1.723 | 1.209 | 2.456 | 2.63E-03 |
| CPS1     | 6.08E-04 | 0.748 | 0.630 | 0.888 | 9.40E-04 |
| C9orf109 | 1.55E-03 | 1.611 | 1.194 | 2.175 | 1.81E-03 |
| PLAU     | 9.47E-03 | 1.739 | 1.145 | 2.640 | 9.45E-03 |
| ETV7     | 1.35E-03 | 1.313 | 1.104 | 1.561 | 2.10E-03 |
| IKZF1    | 3.32E-04 | 1.666 | 1.276 | 2.174 | 1.75E-04 |
| FOXD2    | 5.66E-05 | 1.698 | 1.237 | 2.331 | 1.05E-03 |
| PLEKHG4  | 8.93E-07 | 0.436 | 0.302 | 0.631 | 1.05E-05 |

---
