# Supplementary material for: Identification of prognostic genes in uveal melanoma microenvironment
Source: PubMed Central journal article supplement (PMC7668584; doi:10.1371/journal.pone.0242263), 2020-11-16
Supplement: pone.0242263.s004.pdf [file pone.0242263.s004.pdf]

**S4 Table. 52 genes were significantly predicting the prognosis of UM patients in the validation cohort by both Kaplan-Meier and univariate Cox regression analyses (p-value < 0.01).**

| Gene    | Kaplan-Meier analysis (p-value) | Univariate Cox regression analysis |        |        |          | Chromosome (GRCh38/hg38) |
|---------|---------------------------------|------------------------------------|--------|--------|----------|--------------------------|
|         |                                 | HR                                 | HR.95L | HR.95H | P-value  |                          |
| ACSF2   | 1.59E-04                        | 0.557                              | 0.385  | 0.806  | 1.88E-03 | 17                       |
| ADCY1   | 5.90E-05                        | 2.227                              | 1.402  | 3.539  | 7.02E-04 | 07                       |
| AHNAK2  | 2.83E-04                        | 1.460                              | 1.199  | 1.778  | 1.65E-04 | 14                       |
| ALDH1L1 | 2.10E-03                        | 0.361                              | 0.198  | 0.656  | 8.36E-04 | 03                       |
| AZGP1   | 2.62E-03                        | 0.706                              | 0.585  | 0.853  | 3.06E-04 | 07                       |
| BCAT1   | 2.85E-03                        | 1.817                              | 1.252  | 2.637  | 1.67E-03 | 12                       |
| C1S     | 1.38E-03                        | 1.436                              | 1.091  | 1.891  | 9.87E-03 | 12                       |
| CA12    | 6.73E-06                        | 1.481                              | 1.245  | 1.761  | 9.05E-06 | 15                       |
| CALHM2  | 1.12E-04                        | 1.531                              | 1.198  | 1.956  | 6.60E-04 | 10                       |
| CELF2   | 1.45E-04                        | 1.446                              | 1.106  | 1.891  | 7.09E-03 | 10                       |
| CHAC1   | 1.54E-05                        | 1.483                              | 1.237  | 1.779  | 2.17E-05 | 15                       |
| ECM1    | 1.83E-03                        | 1.354                              | 1.121  | 1.636  | 1.68E-03 | 01                       |
| EDNRB   | 1.76E-03                        | 0.798                              | 0.685  | 0.929  | 3.68E-03 | 13                       |
| GDF11   | 9.66E-05                        | 2.921                              | 1.708  | 4.996  | 9.06E-05 | 12                       |
| GEM     | 4.80E-06                        | 1.298                              | 1.148  | 1.467  | 3.07E-05 | 08                       |
| GSTA3   | 1.58E-03                        | 0.692                              | 0.558  | 0.858  | 8.12E-04 | 06                       |
| HFE     | 4.19E-03                        | 0.003                              | 0.000  | 0.143  | 2.94E-03 | 06                       |
| HTR2B   | 3.42E-04                        | 1.191                              | 1.090  | 1.302  | 1.05E-04 | 02                       |
| HTRA1   | 7.17E-05                        | 1.545                              | 1.230  | 1.941  | 1.86E-04 | 10                       |
| IGFBP2  | 4.80E-05                        | 1.518                              | 1.246  | 1.850  | 3.51E-05 | 02                       |
| IL12RB2 | 7.02E-04                        | 0.594                              | 0.442  | 0.798  | 5.47E-04 | 01                       |
| ISM1    | 7.62E-04                        | 1.934                              | 1.408  | 2.655  | 4.59E-05 | 20                       |
| LINGO1  | 1.68E-03                        | 2.016                              | 1.242  | 3.271  | 4.53E-03 | 15                       |
| ME1     | 2.63E-03                        | 1.543                              | 1.115  | 2.136  | 8.86E-03 | 06                       |
| MTUS1   | 5.33E-04                        | 0.538                              | 0.397  | 0.729  | 6.33E-05 | 08                       |
| MYEOV   | 3.85E-03                        | 1.316                              | 1.124  | 1.540  | 6.49E-04 | 11                       |
| NEDD9   | 3.47E-03                        | 0.306                              | 0.165  | 0.570  | 1.91E-04 | 06                       |
| NR6A1   | 3.33E-03                        | 0.043                              | 0.004  | 0.454  | 8.91E-03 | 09                       |
| PAPSS2  | 5.99E-03                        | 1.942                              | 1.252  | 3.012  | 3.05E-03 | 10                       |

|          |          |       |       |       |          |    |
|----------|----------|-------|-------|-------|----------|----|
| PDE3A    | 7.79E-04 | 0.611 | 0.452 | 0.825 | 1.33E-03 | 12 |
| PEG3     | 6.78E-03 | 0.745 | 0.598 | 0.927 | 8.25E-03 | 19 |
| PLEKHG4B | 1.19E-03 | 1.473 | 1.139 | 1.906 | 3.17E-03 | 05 |
| PPM1K    | 5.97E-04 | 1.612 | 1.218 | 2.134 | 8.45E-04 | 04 |
| RAB31    | 1.69E-03 | 1.505 | 1.154 | 1.963 | 2.55E-03 | 18 |
| RAPGEF3  | 8.13E-04 | 0.413 | 0.223 | 0.764 | 4.86E-03 | 12 |
| RIMS2    | 2.40E-03 | 1.440 | 1.213 | 1.708 | 3.01E-05 | 08 |
| RNF43    | 7.98E-04 | 0.642 | 0.472 | 0.873 | 4.66E-03 | 17 |
| SERPINB9 | 4.65E-03 | 0.654 | 0.495 | 0.864 | 2.80E-03 | 06 |
| SIPA1L2  | 3.66E-03 | 1.924 | 1.341 | 2.762 | 3.84E-04 | 01 |
| SKAP1    | 1.37E-03 | 0.000 | 0.000 | 0.000 | 8.57E-03 | 17 |
| SLCO5A1  | 1.60E-03 | 1.412 | 1.124 | 1.772 | 2.99E-03 | 08 |
| SMOC2    | 5.97E-03 | 3.321 | 1.790 | 6.160 | 1.40E-04 | 06 |
| SOCS2    | 5.80E-03 | 3.020 | 1.485 | 6.141 | 2.28E-03 | 12 |
| SSX1     | 6.40E-04 | 1.639 | 1.185 | 2.266 | 2.80E-03 | X  |
| SULF2    | 5.89E-04 | 1.924 | 1.321 | 2.802 | 6.48E-04 | 20 |
| TGFBI    | 4.43E-03 | 1.256 | 1.056 | 1.494 | 9.83E-03 | 05 |
| THBS2    | 2.07E-04 | 1.285 | 1.115 | 1.479 | 5.08E-04 | 06 |
| TRPV2    | 1.86E-03 | 2.050 | 1.359 | 3.091 | 6.17E-04 | 17 |
| WARS     | 2.07E-04 | 1.282 | 1.097 | 1.499 | 1.76E-03 | 14 |
| ZNF415   | 2.22E-03 | 0.663 | 0.487 | 0.904 | 9.34E-03 | 19 |
| ZNF667   | 8.28E-03 | 0.530 | 0.329 | 0.854 | 9.12E-03 | 19 |
| ZNF781   | 2.27E-03 | 0.004 | 0.000 | 0.189 | 5.22E-03 | 19 |

---
